# Supplementary material
Source: Royal Society of Chemistry journal article supplement (doi:10.1039/d6tc00959j)
Supplement: d6tc00959j1.pdf [file d6tc00959j1.pdf]

## SUPPORTING INFORMATION

### Tuning the Optoelectronic Properties of Iminodibenzyl-Triphenylamine Based Semiconductors: Hybrid Self-Powered Photodetector Applications

Musa Erdogan<sup>s,b,1</sup>, Hilal Medetalibeyoğlu<sup>c</sup>, Fatma Yıldırım<sup>d</sup>, , and Şakir Aydoğan<sup>d,2</sup>

<sup>a</sup>Department of Food Engineering, Faculty of Engineering and Architecture, Kafkas University, 36100, Kars, Türkiye

<sup>b</sup>Department of Industrial Engineering, Faculty of Engineering and Architecture, Kafkas University, 36100, Kars, Türkiye

<sup>c</sup>Department of Chemistry, Faculty of Science and Letters, Kafkas University, Kars 36100, Türkiye

<sup>d</sup>Department of Physics, Sciences Faculty, Atatürk University, 25240, Erzurum, Türkiye

#### TABLE OF CONTENTS

|                                                                                                                        |    |
|------------------------------------------------------------------------------------------------------------------------|----|
| <b>Fig 1.</b> <sup>1</sup> H NMR spectrum of the compound <b>2</b> .....                                               | 2  |
| <b>Fig 2.</b> <sup>13</sup> C NMR spectrum of the compound <b>2</b> .....                                              | 2  |
| <b>Fig 3.</b> <sup>1</sup> H NMR spectrum of the compound <b>4</b> .....                                               | 3  |
| <b>Fig 4.</b> <sup>13</sup> C NMR spectrum of the compound <b>4</b> .....                                              | 3  |
| <b>Fig 5.</b> HRMS spectrum of the compound <b>4</b> .....                                                             | 4  |
| <b>Fig 6.</b> <sup>1</sup> H NMR spectrum of the IDB–TPA <b>1</b> .....                                                | 4  |
| <b>Fig 7.</b> HRMS spectrum of the IDB–TPA <b>1</b> .....                                                              | 5  |
| <b>Fig 8.</b> FTIR spectrum of the IDB–TPA <b>1</b> . .....                                                            | 5  |
| <b>Fig 9.</b> <sup>1</sup> H NMR spectrum of the IDB–TPA <b>2</b> .....                                                | 6  |
| <b>Fig 10.</b> <sup>13</sup> C NMR spectrum of IDB–TPA <b>2</b> .....                                                  | 6  |
| <b>Fig 11.</b> HRMS spectrum of the IDB–TPA <b>2</b> . .....                                                           | 7  |
| <b>Fig 12.</b> FTIR spectrum of the IDB–TPA <b>2</b> . .....                                                           | 7  |
| Geometry computed at the M062x/6-311G(d,p) level ( <b>IDB–TPA 1</b> ).....                                             | 8  |
| Geometry computed at the M062x/6-311G(d,p) level ( <b>IDB–TPA 2</b> ).....                                             | 12 |
| <b>Fig. S13.</b> UV-Vis absorption spectra and corresponding Tauc plots of <b>IDB-TPA 1</b> and <b>IDB-TPA 2</b> ..... | 16 |

<sup>1,2</sup> Correspondence to: Musa Erdogan and Şakir Aydoğan

E-mail addresses: [musa.erdogan@kafkas.edu.tr](mailto:musa.erdogan@kafkas.edu.tr) (M. Erdogan) and [saydogan@atauni.edu.tr](mailto:saydogan@atauni.edu.tr) (Ş. Aydoğan),

Fax: 009 0 442 231 41 09, Tel: 0090 442 231 4073

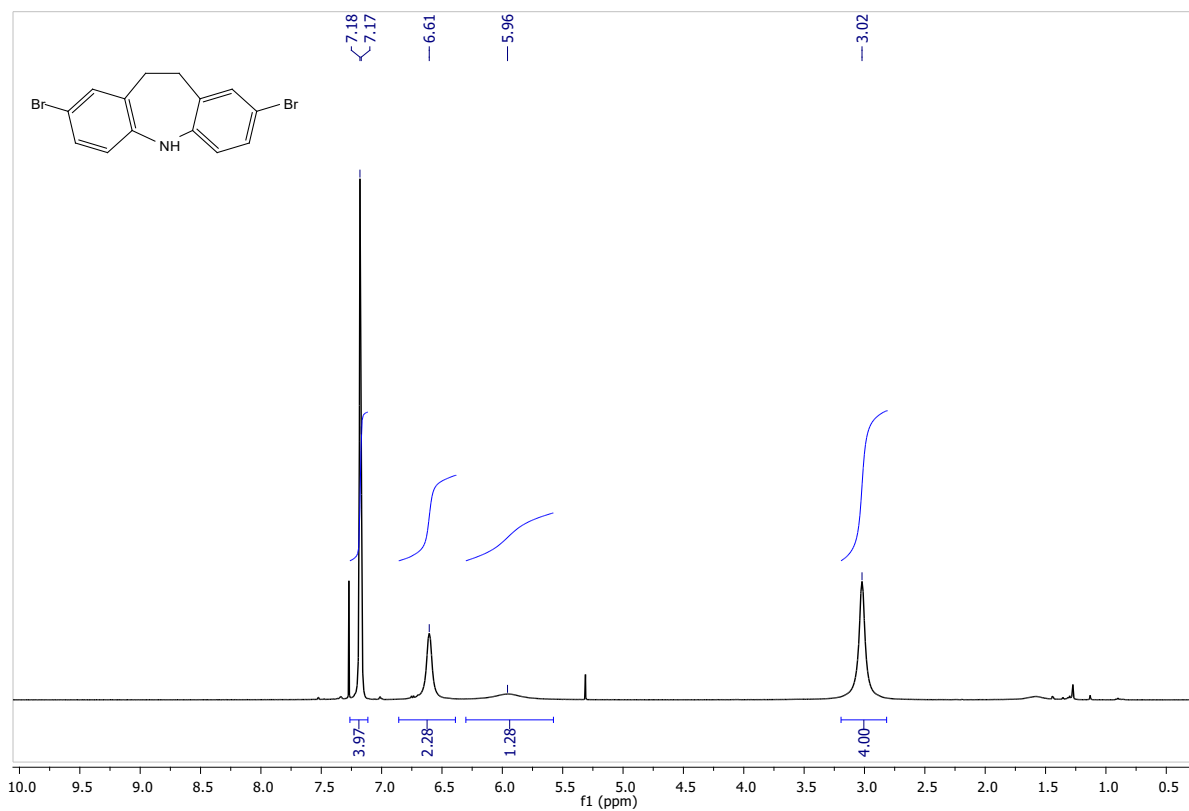

**Fig S1.**  $^1\text{H}$  NMR spectrum of the compound **2** ( $\text{CDCl}_3$ ).

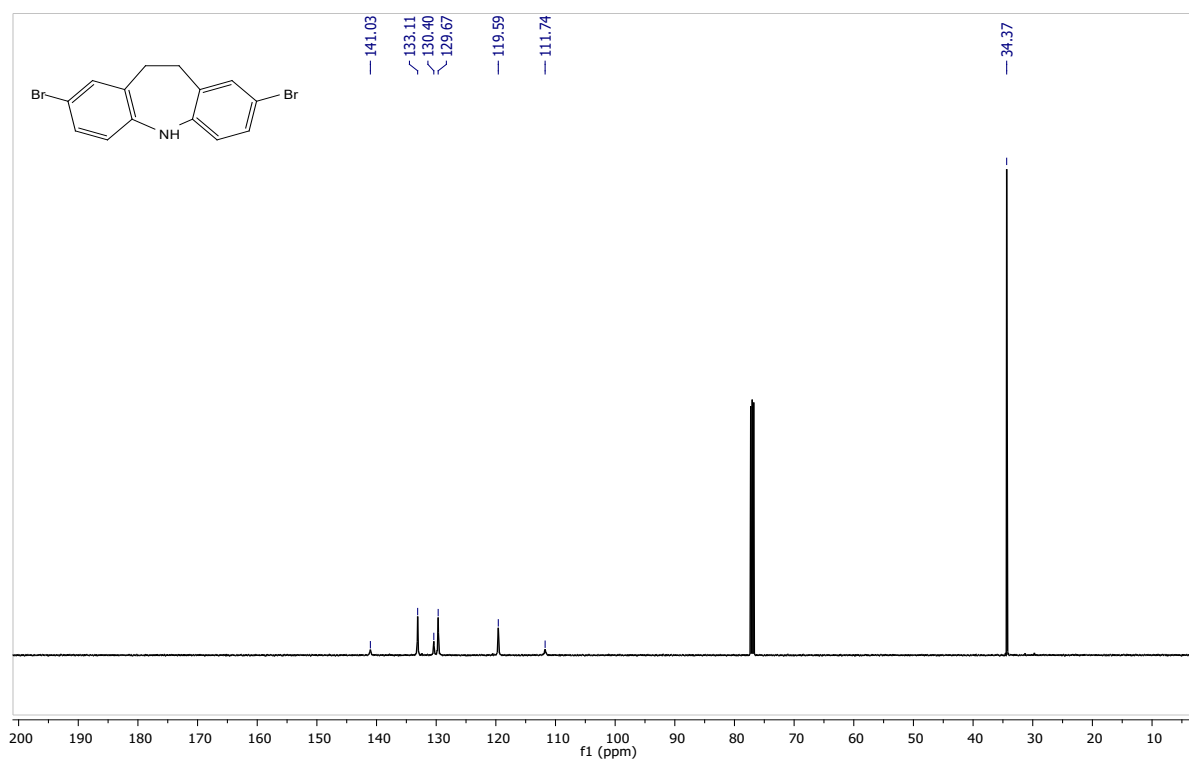

**Fig S2.**  $^{13}\text{C}$  NMR spectrum of the compound **2** ( $\text{CDCl}_3$ ).

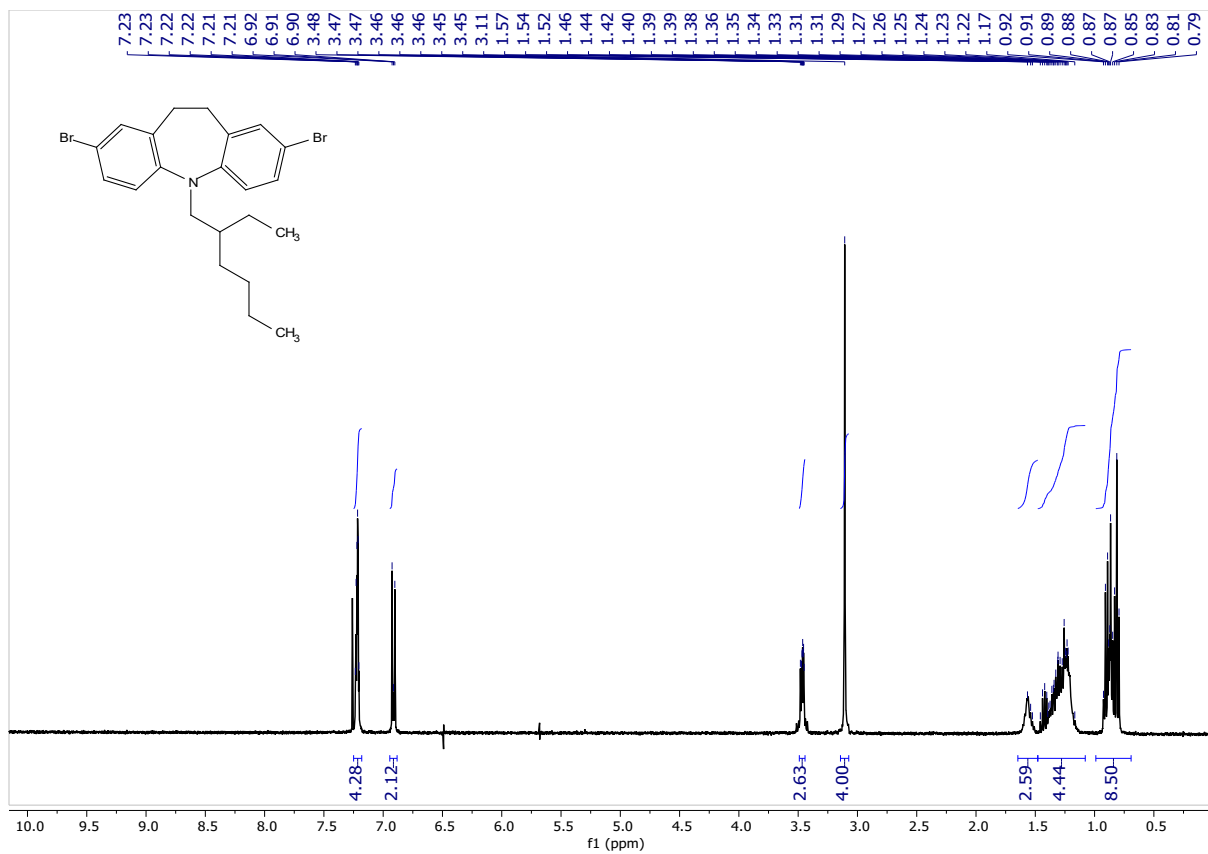

**Fig S3.** <sup>1</sup>H NMR spectrum of the compound 4 (CDCl<sub>3</sub>).

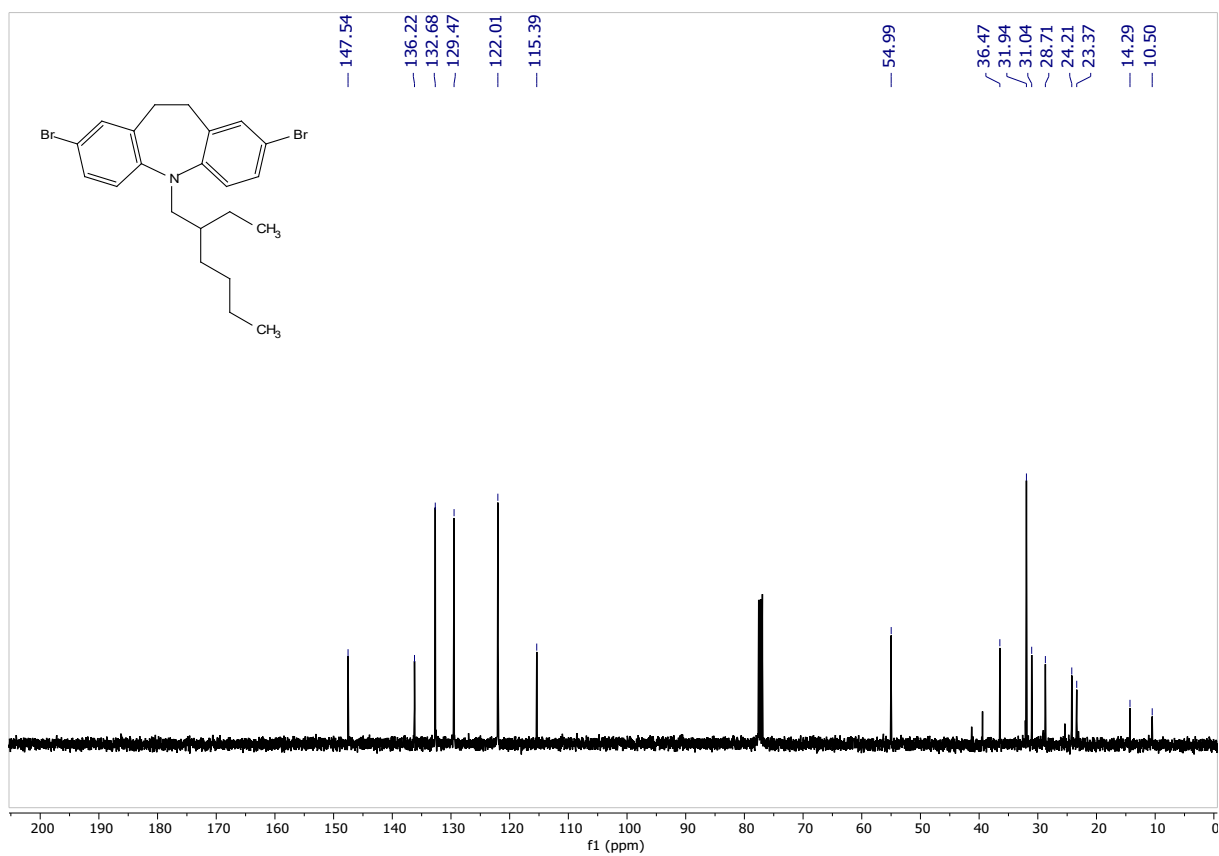

**Fig S4.** <sup>13</sup>C NMR spectrum of the compound 4 (CDCl<sub>3</sub>).

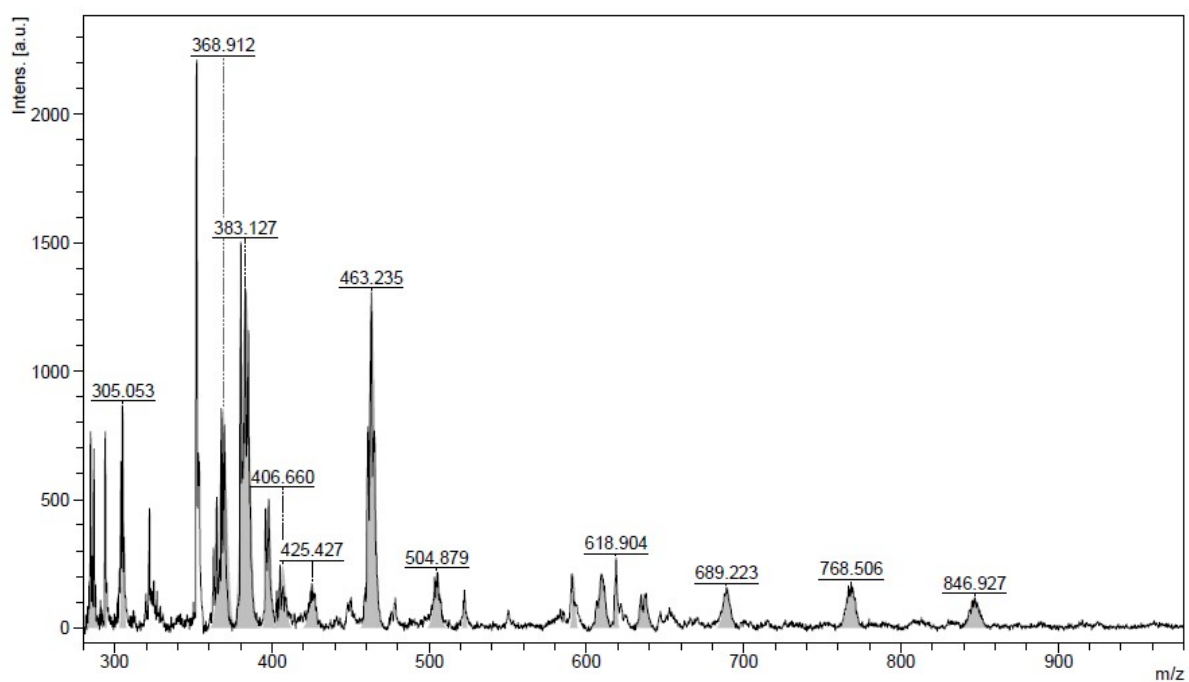

**Fig S5.** HRMS spectrum of the compound 4.

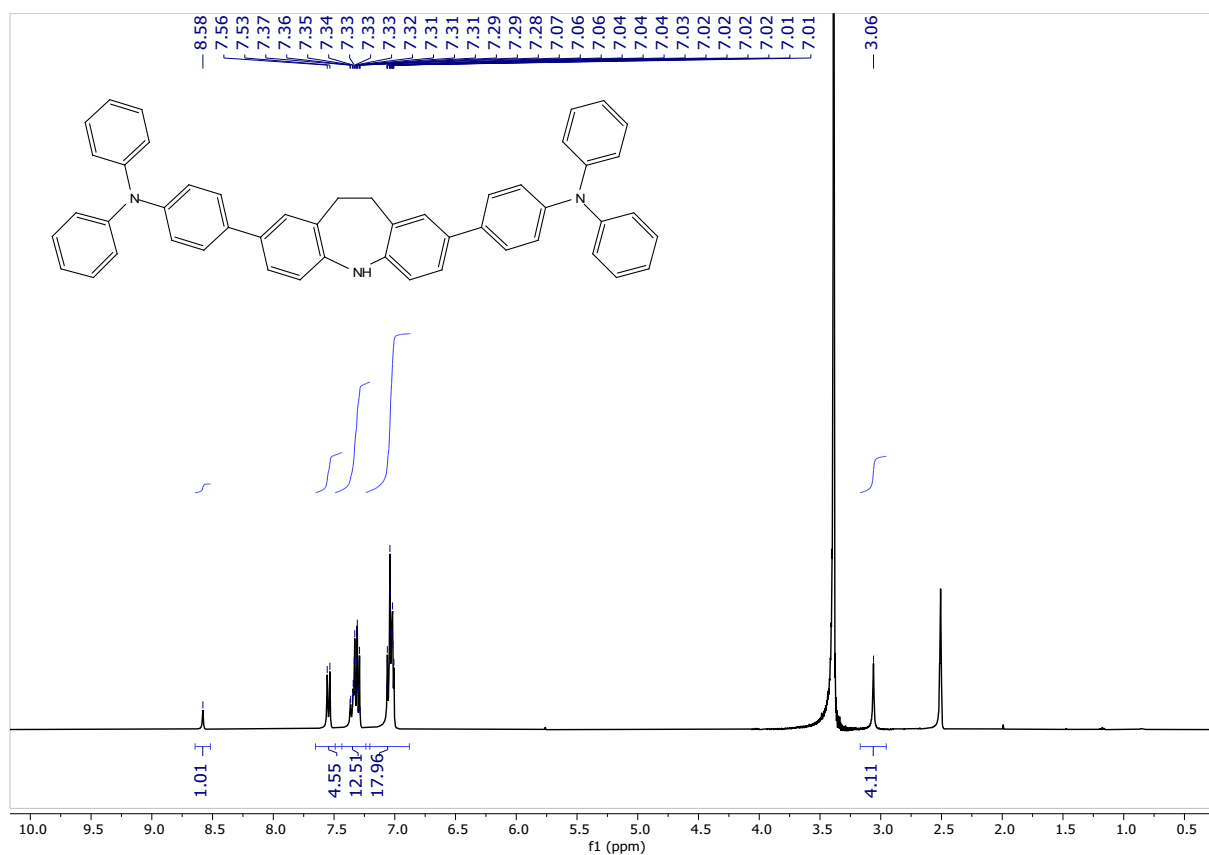

**Fig S6.** <sup>1</sup>H NMR spectrum of the IDB-TPA 1 (DMSO-*d*<sub>6</sub>).

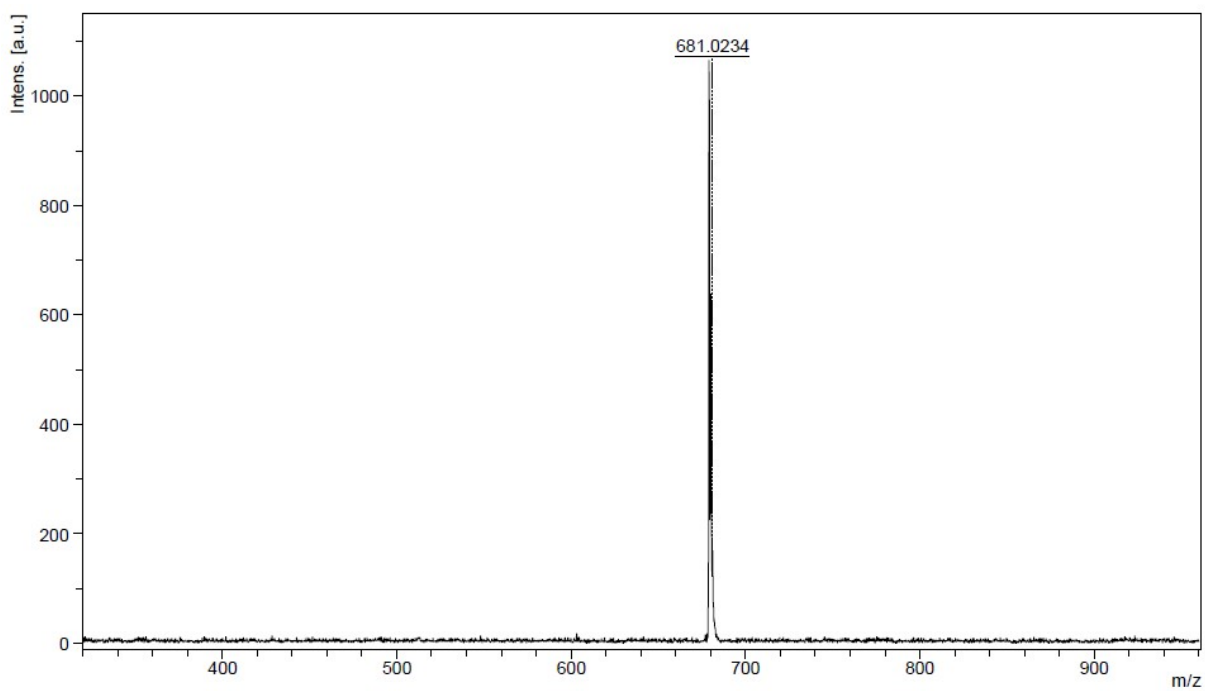

**Fig S7.** HRMS spectrum of the IDB-TPA 1.

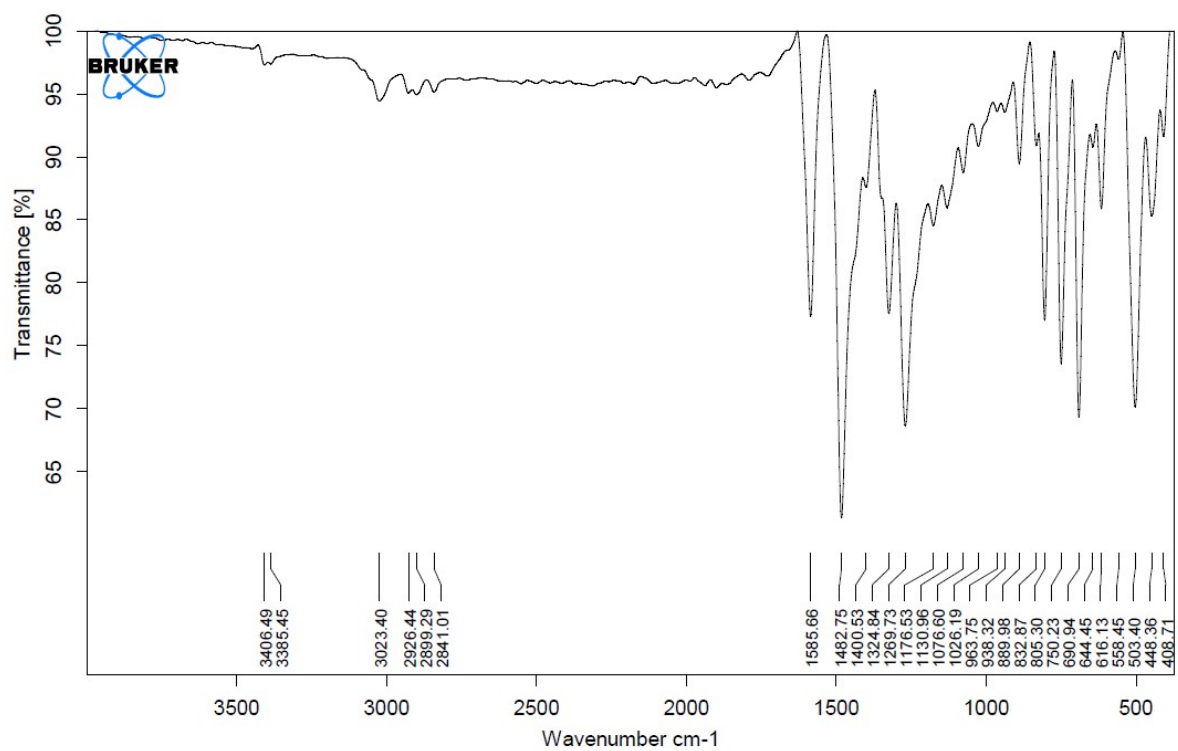

**Fig S8.** FTIR spectrum of the IDB-TPA 1.

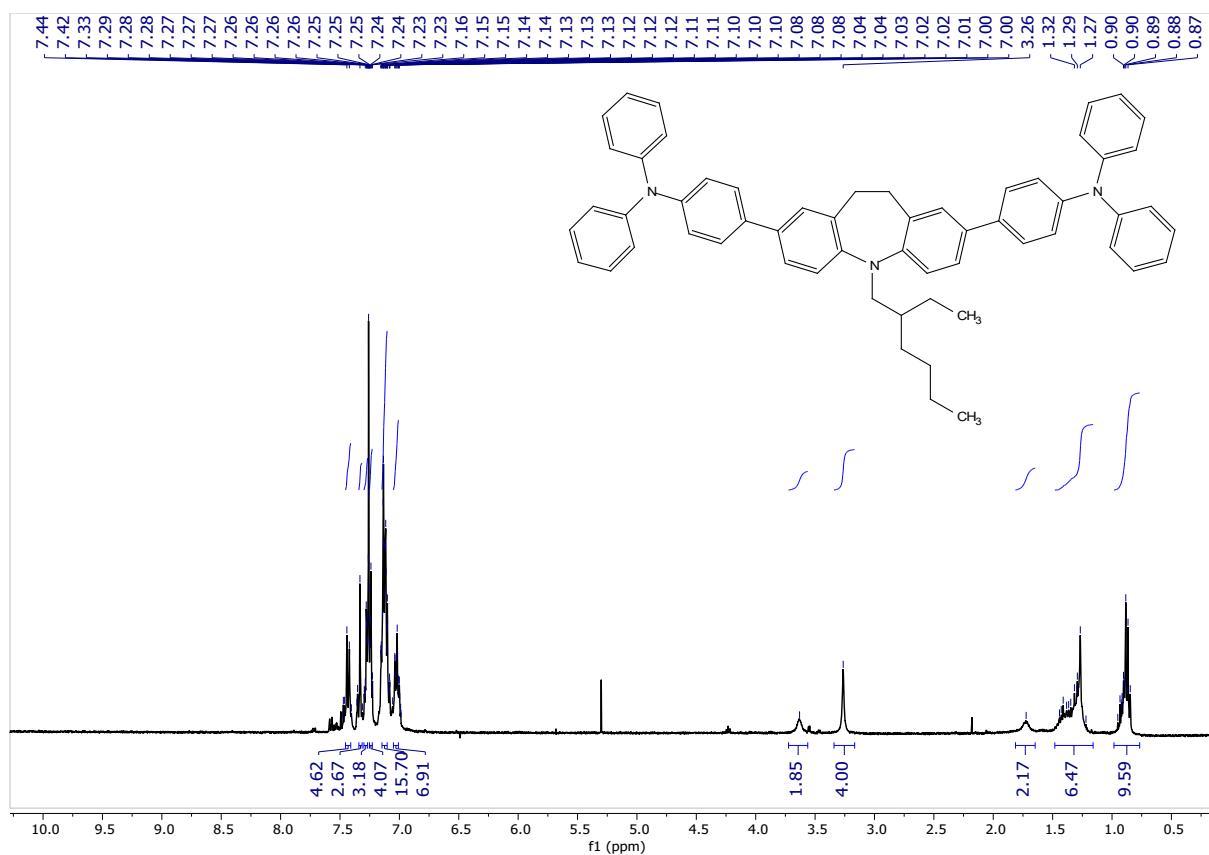

**Fig S9.** <sup>1</sup>H NMR spectrum of the IDB-TPA 2 (CDCl<sub>3</sub>).

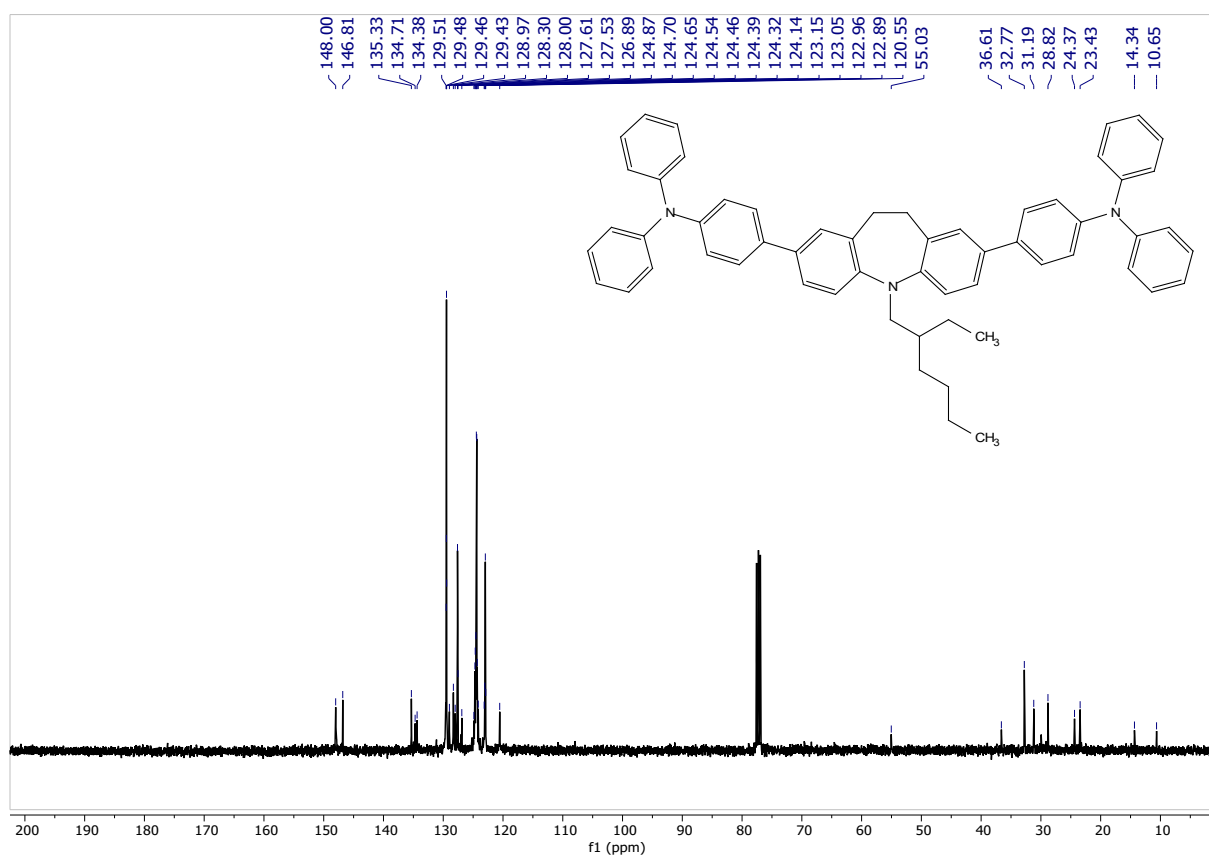

**Fig S10.** <sup>13</sup>C NMR spectrum of the IDB-TPA 2 (CDCl<sub>3</sub>).

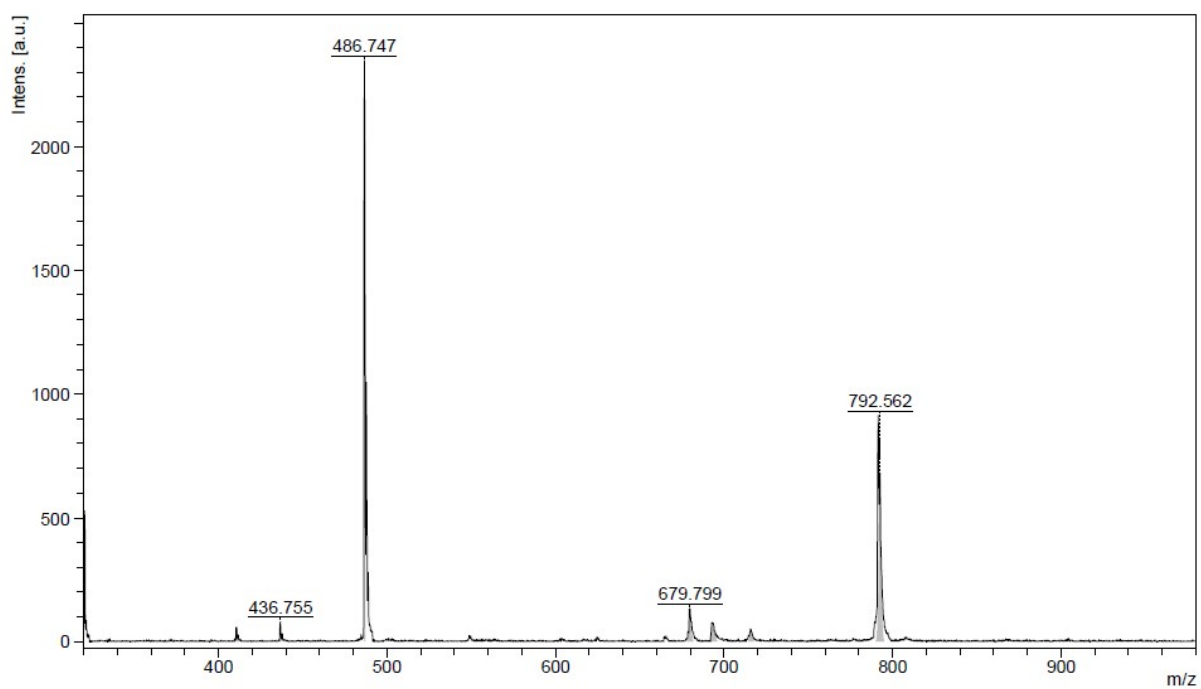

**Fig S11.** HRMS spectrum of the IDB-TPA 2.

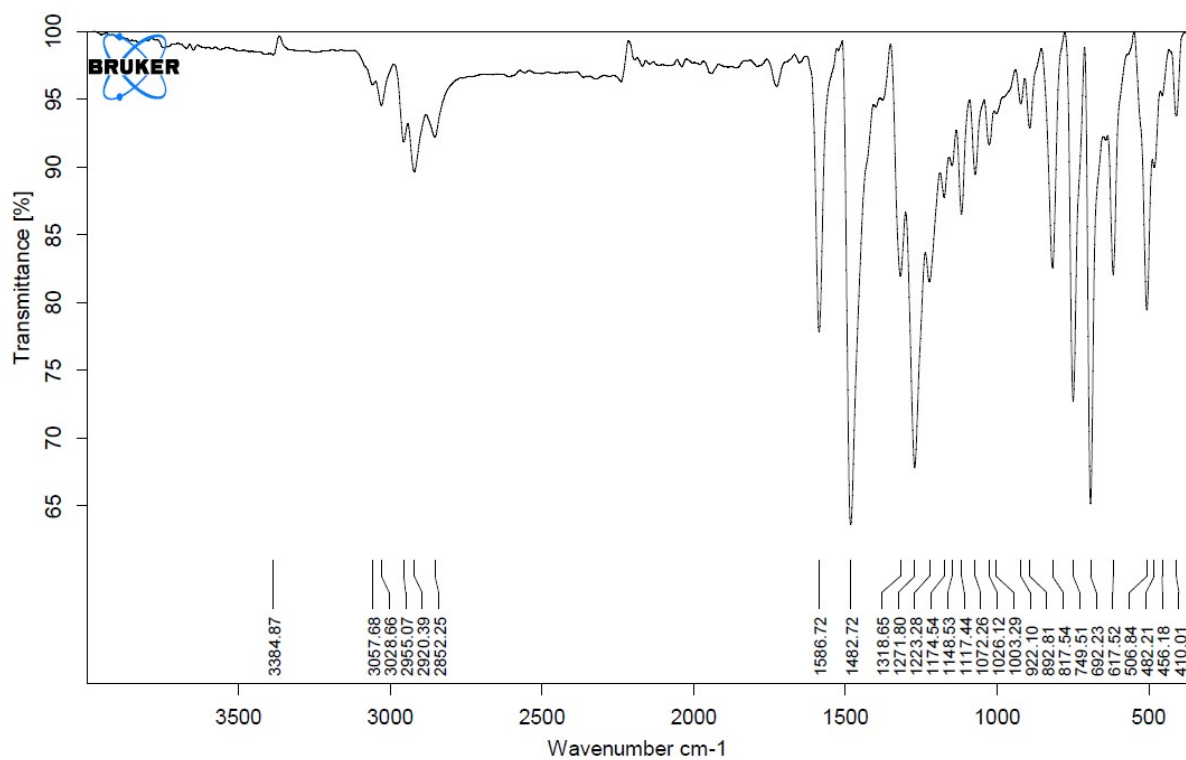

**Fig S12.** FTIR spectrum of the IDB-TPA 2.

Geometry computed at the M062x/6-311G(d,p) level (**IDB-TPA 1**)

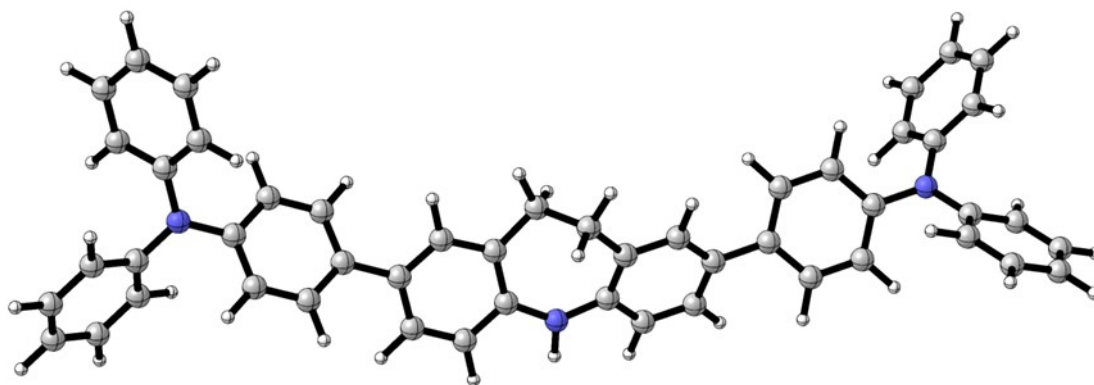

92

symmetry c1

|   |              |              |              |
|---|--------------|--------------|--------------|
| C | -0.539283000 | 0.450627000  | 0.002469000  |
| C | -1.599607000 | -0.589583000 | -0.246142000 |
| C | -1.293799000 | -1.924874000 | -0.562482000 |
| N | -0.011559000 | -2.453214000 | -0.719982000 |
| C | 1.282583000  | -1.949846000 | -0.580208000 |
| C | 1.623538000  | -0.833193000 | 0.199401000  |
| C | 0.577603000  | -0.046703000 | 0.937434000  |
| C | 2.305927000  | -2.656492000 | -1.228831000 |
| C | 3.629077000  | -2.272977000 | -1.120001000 |
| C | 3.987197000  | -1.151475000 | -0.367890000 |
| C | 2.961047000  | -0.454726000 | 0.271194000  |
| C | -2.940534000 | -0.229032000 | -0.126559000 |
| C | -3.998208000 | -1.114872000 | -0.326292000 |
| C | -3.672221000 | -2.434154000 | -0.651101000 |
| C | -2.353118000 | -2.825812000 | -0.760332000 |
| C | -5.405423000 | -0.677905000 | -0.196476000 |
| C | 5.398742000  | -0.723274000 | -0.248441000 |
| C | -5.819154000 | 0.580387000  | -0.645543000 |
| C | -7.139156000 | 0.988798000  | -0.534075000 |
| C | -8.092078000 | 0.148816000  | 0.048608000  |

|   |               |              |              |
|---|---------------|--------------|--------------|
| C | -7.689366000  | -1.107964000 | 0.508381000  |
| C | -6.369796000  | -1.511868000 | 0.378588000  |
| C | 6.429876000   | -1.661622000 | -0.138448000 |
| C | 7.755599000   | -1.269494000 | -0.036990000 |
| C | 8.091943000   | 0.086700000  | -0.020076000 |
| C | 7.069503000   | 1.034216000  | -0.118315000 |
| C | 5.748872000   | 0.630617000  | -0.241292000 |
| N | -9.439319000  | 0.562378000  | 0.169851000  |
| H | -1.021503000  | 1.328102000  | 0.438095000  |
| H | -0.088646000  | 0.772439000  | -0.941854000 |
| H | 0.130569000   | -0.656098000 | 1.729633000  |
| H | 1.060529000   | 0.804160000  | 1.421616000  |
| H | 2.045428000   | -3.513421000 | -1.841935000 |
| H | 4.389995000   | -2.829089000 | -1.655593000 |
| H | 3.213776000   | 0.401085000  | 0.889579000  |
| H | -3.164139000  | 0.795053000  | 0.156112000  |
| H | -4.459318000  | -3.155325000 | -0.839446000 |
| H | -2.122395000  | -3.856093000 | -1.012790000 |
| H | -5.101858000  | 1.235702000  | -1.126983000 |
| H | -7.444340000  | 1.959962000  | -0.905438000 |
| H | -8.417906000  | -1.761311000 | 0.973724000  |
| H | -6.072694000  | -2.479852000 | 0.766533000  |
| H | 6.188133000   | -2.718384000 | -0.119608000 |
| H | 8.540338000   | -2.012120000 | 0.045717000  |
| H | 7.320573000   | 2.088304000  | -0.113053000 |
| H | 4.973898000   | 1.381602000  | -0.346087000 |
| H | -0.024599000  | -3.381939000 | -1.112706000 |
| C | -9.741282000  | 1.902338000  | 0.512008000  |
| C | -10.807202000 | 2.565307000  | -0.102914000 |
| C | -8.977645000  | 2.578188000  | 1.467893000  |
| C | -11.105202000 | 3.876747000  | 0.241588000  |
| H | -11.397530000 | 2.043192000  | -0.846518000 |
| C | -9.273253000  | 3.895324000  | 1.792642000  |
| H | -8.153428000  | 2.063793000  | 1.947572000  |

|   |               |              |              |
|---|---------------|--------------|--------------|
| C | -10.339466000 | 4.551832000  | 1.186573000  |
| H | -11.934902000 | 4.377473000  | -0.243213000 |
| H | -8.672294000  | 4.406589000  | 2.535383000  |
| H | -10.570826000 | 5.576972000  | 1.447483000  |
| C | -10.486767000 | -0.364418000 | -0.048791000 |
| C | -11.622199000 | -0.352730000 | 0.766370000  |
| C | -10.397728000 | -1.302418000 | -1.081231000 |
| C | -12.650299000 | -1.258742000 | 0.543738000  |
| H | -11.690664000 | 0.371932000  | 1.569008000  |
| C | -11.423708000 | -2.215415000 | -1.284518000 |
| H | -9.519505000  | -1.309693000 | -1.715826000 |
| C | -12.557221000 | -2.197898000 | -0.478233000 |
| H | -13.524512000 | -1.237401000 | 1.183631000  |
| H | -11.340417000 | -2.937035000 | -2.088586000 |
| H | -13.358209000 | -2.907347000 | -0.644395000 |
| N | 9.442693000   | 0.492410000  | 0.094912000  |
| C | 10.318835000  | -0.206494000 | 0.959841000  |
| C | 11.636975000  | -0.464968000 | 0.573512000  |
| C | 9.875133000   | -0.647583000 | 2.209773000  |
| C | 12.494148000  | -1.144093000 | 1.428798000  |
| H | 11.980647000  | -0.126608000 | -0.396765000 |
| C | 10.735186000  | -1.341203000 | 3.050430000  |
| H | 8.854129000   | -0.445310000 | 2.511006000  |
| C | 12.049599000  | -1.590216000 | 2.669201000  |
| H | 13.513565000  | -1.336569000 | 1.115866000  |
| H | 10.376874000  | -1.677523000 | 4.016172000  |
| H | 12.719331000  | -2.125483000 | 3.330615000  |
| C | 9.918193000   | 1.594515000  | -0.654960000 |
| C | 10.816550000  | 2.501993000  | -0.085979000 |
| C | 9.494964000   | 1.789562000  | -1.972854000 |
| C | 11.286702000  | 3.576921000  | -0.828221000 |
| H | 11.142717000  | 2.354334000  | 0.936660000  |
| C | 9.957533000   | 2.877715000  | -2.700503000 |
| H | 8.801125000   | 1.085466000  | -2.416511000 |

|   |              |             |              |
|---|--------------|-------------|--------------|
| C | 10.858446000 | 3.775314000 | -2.136779000 |
| H | 11.983231000 | 4.271399000 | -0.373536000 |
| H | 9.619625000  | 3.015934000 | -3.720739000 |
| H | 11.222140000 | 4.618860000 | -2.710048000 |

Geometry computed at the M062x/6-311G(d,p) level (**IDB-TPA 2**)

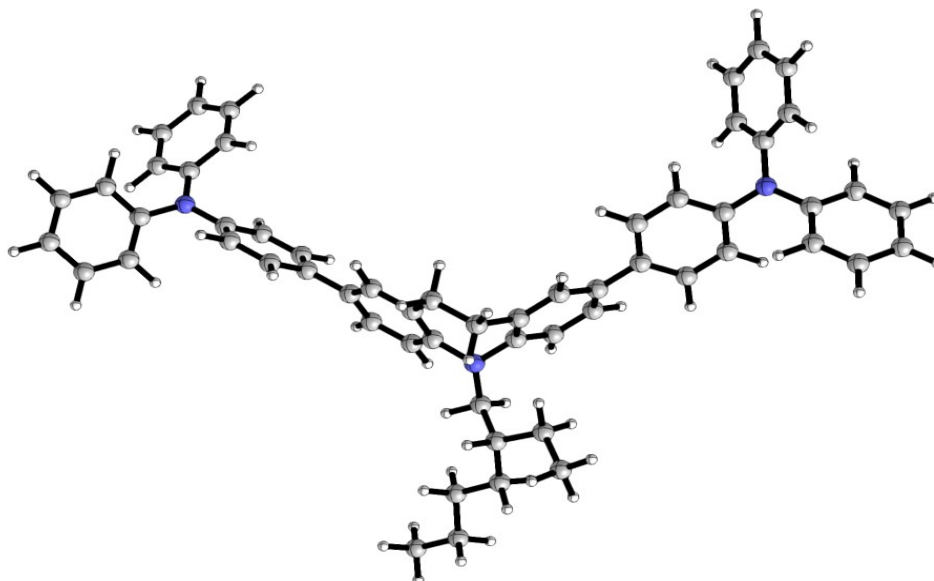

116

symmetry c1

|   |              |              |              |
|---|--------------|--------------|--------------|
| C | -0.738203000 | 0.003486000  | -2.245999000 |
| C | -1.665659000 | 0.703003000  | -1.188550000 |
| C | -1.272932000 | 1.773472000  | -0.348579000 |
| N | -0.075091000 | 2.553676000  | -0.672929000 |
| C | 1.139140000  | 1.815322000  | -0.396578000 |
| C | 1.446443000  | 0.929679000  | -1.384010000 |
| C | 0.492511000  | 0.862321000  | -2.600732000 |
| C | 1.952619000  | 1.954386000  | 0.739193000  |
| C | 3.110250000  | 1.226662000  | 0.830551000  |
| C | 3.458040000  | 0.315817000  | -0.192892000 |
| C | 2.585777000  | 0.126086000  | -1.277833000 |
| C | -2.974305000 | 0.233888000  | -1.071613000 |
| C | -3.813945000 | 0.706540000  | -0.058660000 |
| C | -3.314561000 | 1.595713000  | 0.910119000  |
| C | -2.062123000 | 2.121682000  | 0.768277000  |
| C | -5.279857000 | 0.220115000  | -0.056963000 |
| C | 4.795121000  | -0.472078000 | -0.174626000 |
| C | -5.692434000 | -0.630171000 | -1.084183000 |

|   |              |              |              |
|---|--------------|--------------|--------------|
| C | -7.018712000 | -1.055203000 | -1.150199000 |
| C | -7.903602000 | -0.663266000 | -0.207123000 |
| C | -7.492485000 | 0.174749000  | 0.851471000  |
| C | -6.200852000 | 0.608975000  | 0.926570000  |
| C | 5.840852000  | -0.146910000 | 0.707242000  |
| C | 7.079956000  | -0.810911000 | 0.585282000  |
| C | 7.238970000  | -1.789820000 | -0.346890000 |
| C | 6.156239000  | -2.177447000 | -1.151735000 |
| C | 4.969754000  | -1.524895000 | -1.076313000 |
| N | -9.298459000 | -1.123775000 | -0.306650000 |
| H | -1.322475000 | -0.170083000 | -3.125076000 |
| H | -0.383046000 | -0.926699000 | -1.854669000 |
| H | 0.158952000  | 1.842727000  | -2.875231000 |
| H | 1.026207000  | 0.426186000  | -3.417390000 |
| H | 1.674995000  | 2.627821000  | 1.523778000  |
| H | 3.752488000  | 1.348669000  | 1.678703000  |
| H | 2.798910000  | -0.609372000 | -2.023947000 |
| H | -3.341235000 | -0.495345000 | -1.760244000 |
| H | -3.920311000 | 1.870280000  | 1.749223000  |
| H | -1.688144000 | 2.814774000  | 1.496471000  |
| H | -4.990885000 | -0.951698000 | -1.824407000 |
| H | -7.336919000 | -1.695432000 | -1.947326000 |
| H | -8.198311000 | 0.472113000  | 1.599949000  |
| H | -5.893449000 | 1.245218000  | 1.731301000  |
| H | 5.705892000  | 0.605420000  | 1.455910000  |
| H | 7.895905000  | -0.544490000 | 1.225830000  |
| H | 6.271889000  | -2.989524000 | -1.837148000 |
| H | 4.160594000  | -1.814433000 | -1.713825000 |
| C | -9.336623000 | -2.379901000 | -1.074522000 |
| C | -9.215336000 | -3.615642000 | -0.425926000 |
| C | -9.493810000 | -2.333624000 | -2.468786000 |
| C | -9.238974000 | -4.802319000 | -1.173695000 |
| H | -9.103630000 | -3.652045000 | 0.637000000  |
| C | -9.518212000 | -3.518757000 | -3.214465000 |

|   |               |              |              |
|---|---------------|--------------|--------------|
| H | -9.594324000  | -1.389557000 | -2.965810000 |
| C | -9.389129000  | -4.753314000 | -2.567623000 |
| H | -9.141482000  | -5.746370000 | -0.680574000 |
| H | -9.633964000  | -3.480341000 | -4.277281000 |
| H | -9.404568000  | -5.661242000 | -3.138075000 |
| C | -9.832263000  | -1.339361000 | 1.045784000  |
| C | -11.204887000 | -1.204078000 | 1.297077000  |
| C | -8.959179000  | -1.678257000 | 2.085617000  |
| C | -11.701445000 | -1.396944000 | 2.594194000  |
| H | -11.874306000 | -0.952568000 | 0.500550000  |
| C | -9.453523000  | -1.865520000 | 3.383019000  |
| H | -7.914268000  | -1.792301000 | 1.888498000  |
| C | -10.824925000 | -1.723822000 | 3.638383000  |
| H | -12.748770000 | -1.293645000 | 2.787207000  |
| H | -8.784020000  | -2.116399000 | 4.177752000  |
| H | -11.203169000 | -1.866317000 | 4.630124000  |
| N | 8.544887000   | -2.453577000 | -0.542316000 |
| C | 9.620620000   | -1.453931000 | -0.447527000 |
| C | 10.257292000  | -1.183507000 | 0.769198000  |
| C | 10.005793000  | -0.764661000 | -1.608174000 |
| C | 11.269721000  | -0.211953000 | 0.826279000  |
| H | 9.974481000   | -1.714179000 | 1.653601000  |
| C | 11.013989000  | 0.205268000  | -1.551605000 |
| H | 9.527259000   | -0.979018000 | -2.540211000 |
| C | 11.644302000  | 0.485172000  | -0.334302000 |
| H | 11.758077000  | 0.000038000  | 1.754622000  |
| H | 11.301126000  | 0.732374000  | -2.438565000 |
| H | 12.413079000  | 1.229987000  | -0.289351000 |
| C | 8.732326000   | -3.501647000 | 0.478794000  |
| C | 9.502894000   | -4.639418000 | 0.186149000  |
| C | 8.143567000   | -3.365979000 | 1.742628000  |
| C | 9.681932000   | -5.635933000 | 1.156239000  |
| H | 9.954260000   | -4.745811000 | -0.778170000 |
| C | 8.319151000   | -4.365739000 | 2.711636000  |

|   |              |              |              |
|---|--------------|--------------|--------------|
| H | 7.560085000  | -2.498132000 | 1.970001000  |
| C | 9.089095000  | -5.500072000 | 2.417670000  |
| H | 10.271290000 | -6.499978000 | 0.931745000  |
| H | 7.866705000  | -4.262804000 | 3.674511000  |
| H | 9.225245000  | -6.262991000 | 3.157217000  |
| C | -0.109812000 | 3.808858000  | 0.077601000  |
| H | -1.023270000 | 4.326108000  | -0.133242000 |
| H | -0.051699000 | 3.603196000  | 1.126707000  |
| C | 1.076312000  | 4.680065000  | -0.351966000 |
| H | 1.005792000  | 4.881863000  | -1.401918000 |
| C | 1.033438000  | 6.007045000  | 0.432025000  |
| H | 1.113965000  | 5.807144000  | 1.479849000  |
| H | 1.845652000  | 6.633811000  | 0.126336000  |
| C | 2.396844000  | 3.940539000  | -0.065548000 |
| H | 2.474586000  | 3.739455000  | 0.983504000  |
| H | 2.416938000  | 3.016392000  | -0.608651000 |
| C | 3.575158000  | 4.821030000  | -0.510852000 |
| H | 4.496501000  | 4.310630000  | -0.319797000 |
| H | 3.490955000  | 5.026864000  | -1.559464000 |
| H | 3.555399000  | 5.739315000  | 0.035174000  |
| C | -0.306534000 | 6.711066000  | 0.146296000  |
| H | -0.391890000 | 6.903641000  | -0.902374000 |
| H | -1.110413000 | 6.078230000  | 0.460511000  |
| C | -0.371201000 | 8.042964000  | 0.913582000  |
| H | -0.269272000 | 7.857601000  | 1.963722000  |
| H | 0.422339000  | 8.680856000  | 0.585608000  |
| C | -1.723493000 | 8.729440000  | 0.643611000  |
| H | -2.518958000 | 8.099157000  | 0.982692000  |
| H | -1.760061000 | 9.661120000  | 1.168053000  |
| H | -1.830621000 | 8.905949000  | -0.406245000 |

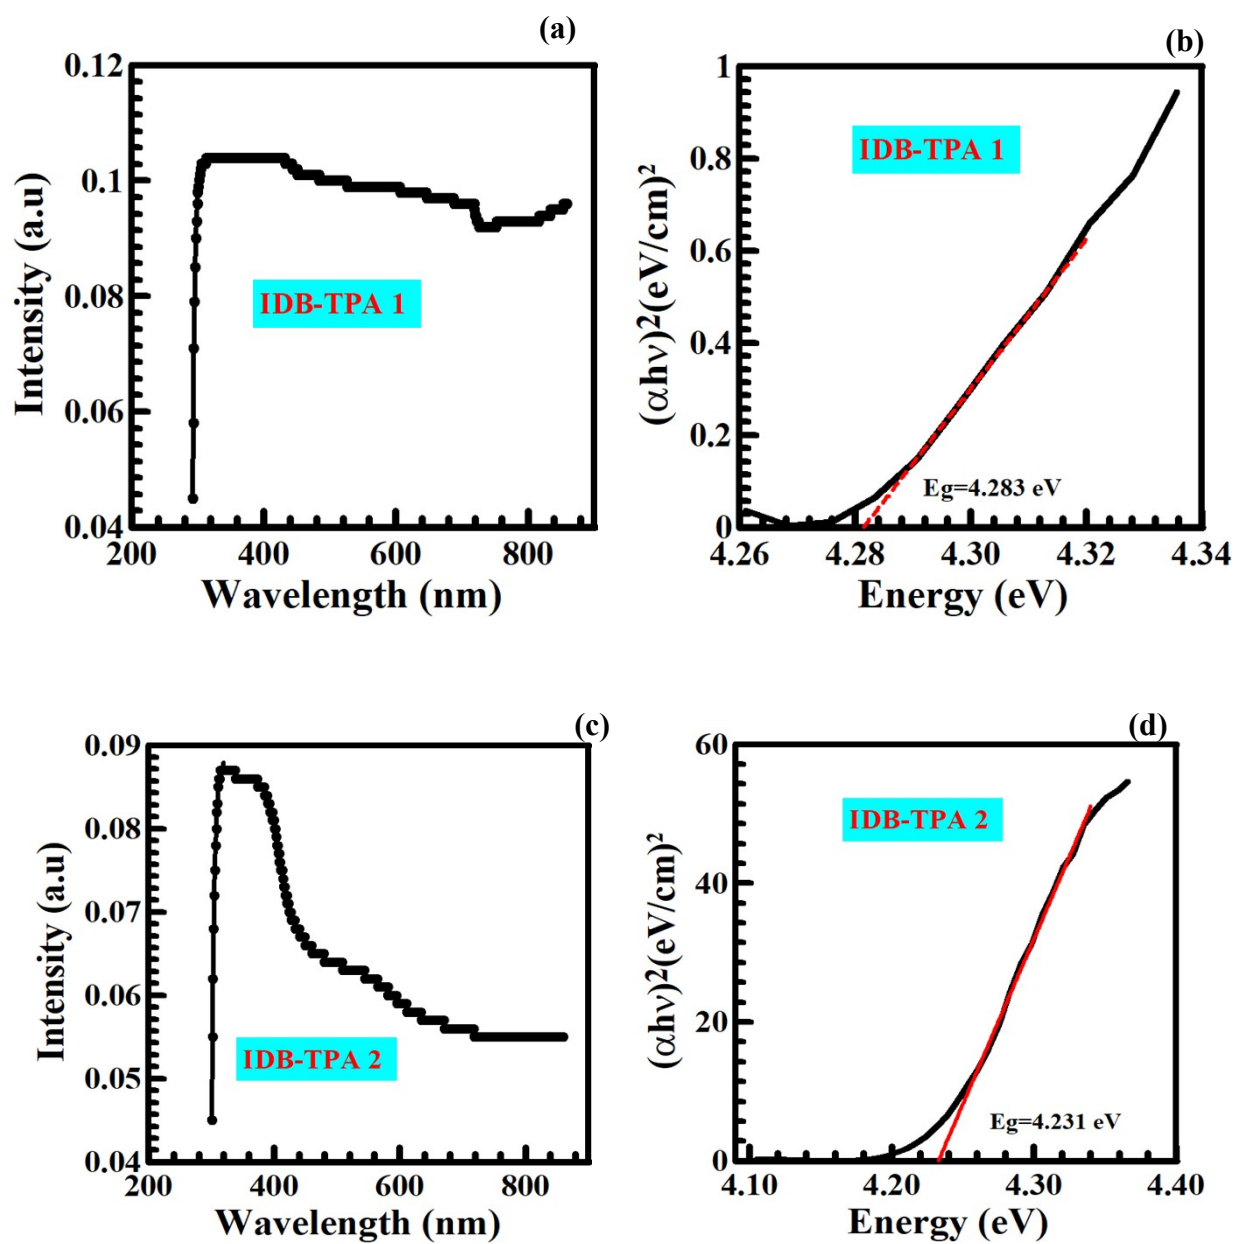

**Fig S13** (a) UV-Vis absorption spectrum of IDB-TPA 1 and (b) its corresponding Tauc plot. (c) UV-Vis absorption spectrum of IDB-TPA 2 and (d) its corresponding Tauc plot.
